# Supplementary material for: Identification and Quantification of Hydrocarbon Functional Groups in Gasoline Using 1H-NMR Spectroscopy for Property Prediction
Source: MDPI journal article supplement (doi:10.3390/molecules26226989), 2021-11-19
Supplement: s1 [file s1]

# Identification and Quantification of Hydrocarbon Functional Groups in Gasoline using $^1\text{H}$ NMR Spectroscopy for Property Prediction

Abdul Gani Abdul Jameel <sup>1, 2\*</sup>

<sup>1</sup> Department of Chemical Engineering, King Fahd University of Petroleum & Minerals, Dhahran 31261, Saudi Arabia

<sup>2</sup> Center for Refining & Advanced Chemicals, King Fahd University of Petroleum & Minerals, Dhahran 31261, Saudi Arabia

Correspondence Abdul Gani Abdul Jameel < a.abduljameel@kfupm.edu.sa >

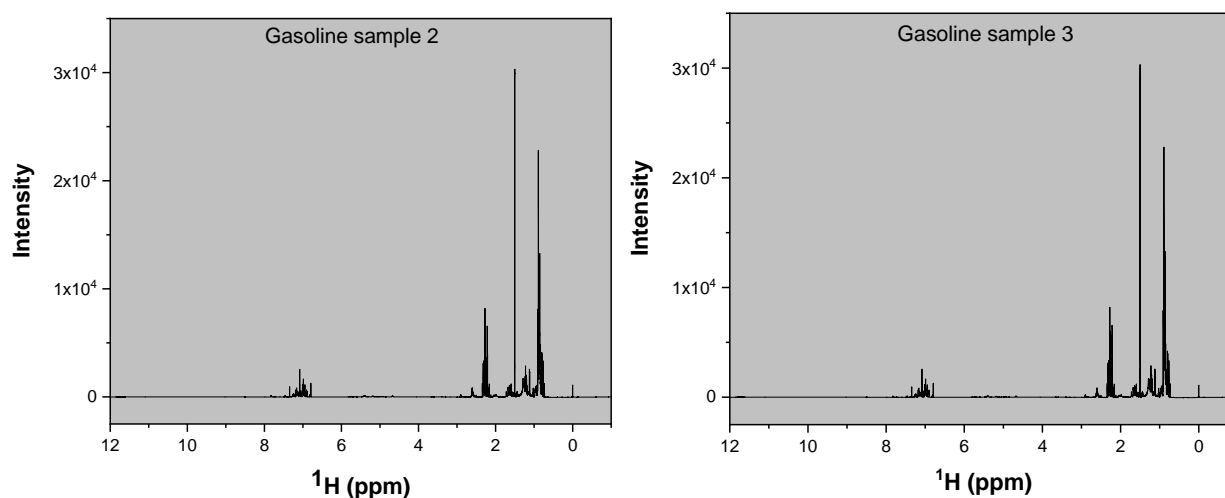

**Figure S1.**  $^1\text{H}$  NMR spectra of the other gasoline samples measured

**Table S1.** Predicted fuel properties for additional samples

| <b>Property</b> | <b>Sample 2<br/>(No unit)</b> | <b>Sample 3<br/>(No unit)</b> |
|-----------------|-------------------------------|-------------------------------|
| RON             | 95.0                          | 96.1                          |
| MON             | 82.0                          | 82.7                          |
| DCN             | 17.8                          | 17.2                          |
| TSI             | 22.1                          | 21.2                          |
| YSI             | 76.4                          | 75.8                          |
